# Supplementary material for: Dirac surface plasmons in photoexcited bismuth telluride nanowires: optical pump-terahertz probe spectroscopy
Source: Royal Society of Chemistry journal article supplement (doi:10.1039/d0nr09087e), 2021-01-01
Supplement: d0nr09087e1.pdf [file d0nr09087e1.pdf]

1        **Dirac Surface Plasmons in Photoexcited Bismuth Telluride**  
2        **Nanowires : Optical Pump-Terahertz Probe Spectroscopy**

3                    Mithun K P<sup>1,2</sup>, Srabani Kar<sup>1,2</sup>, Abinash Kumar<sup>3</sup>,  
4                    D.V.S. Muthu<sup>1,2</sup>, N Ravishankar<sup>3</sup> and A K Sood<sup>1,2\*</sup>

5                    <sup>1</sup>*Center for Ultrafast Laser Applications,*  
6                    *Indian Institute of Science, Bangalore 560012, India*

7                    <sup>2</sup>*Department of Physics, Indian Institute of Science, Bangalore 560012, India*

8                    <sup>3</sup>*Materials Research Center, Indian Institute of Science, Bangalore 560012, India.*

## 9 I. ATOMIC FORCE MICROSCOPIC (AFM) IMAGE

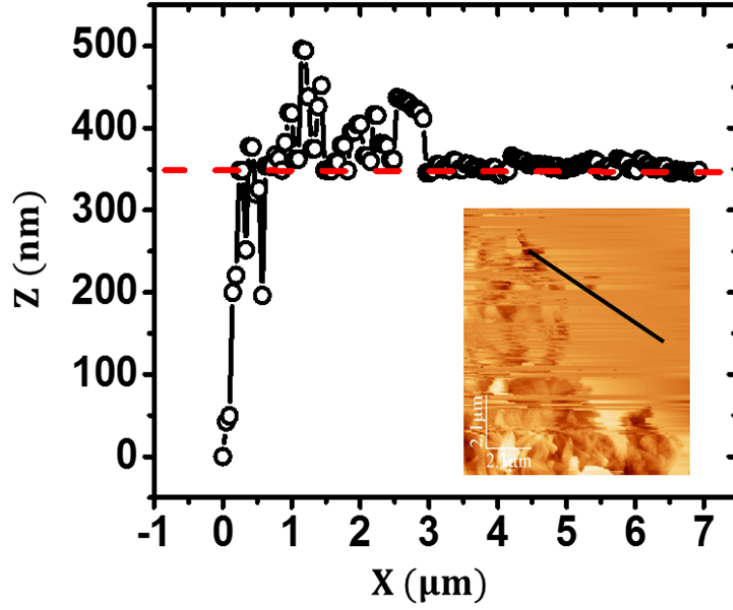

FIG. S1. AFM image of the sample on quartz substrate showing the film thickness ( $t$ ) of  $\sim 350$  nm

## 10 II. DIFFERENTIAL PHOTOCONDUCTIVITY SPECTRUM ( $\Delta\sigma(\omega)$ )

Fig.S2 shows the differential photoconductivity spectrum ( $\Delta\sigma(\omega)$ ) at  $\tau_{pp} = 4$ ps with the pump fluence of  $82.8\mu\text{J}/\text{cm}^2$ . The solid lines corresponds to the fit obtained using the modified Drude Smith conductivity given as,

$$\Delta\sigma(\omega) = \frac{D^*\tau'^*}{1 - i\omega\tau'^*} \left(1 + \frac{1}{1 - i\omega\tau_{\text{diff}}^*}\right) - \sigma_o(\omega) \quad (\text{S1})$$

14

15 where,  $\sigma_o(\omega)$  is the steady state THz conductivity spectrum, given by;

$$\sigma_o(\omega) = \frac{D_o\tau'}{1 - i\omega\tau'} \left(1 - \frac{1}{1 - i\omega\tau_{\text{diff}}}\right) + \frac{-iL_o\omega}{\omega_{\text{ph}}^2 - \omega^2 - i\omega\gamma_o} \quad (\text{S2})$$

16

17 However, in fitting  $\Delta\sigma(\omega)$  using Eq. (S1), we have considered  $L_o = 0$  to explicitly show  
18 the contribution of modified-Drude Smith (MDS) conductivity to  $\Delta\sigma(\omega)$ . The significant

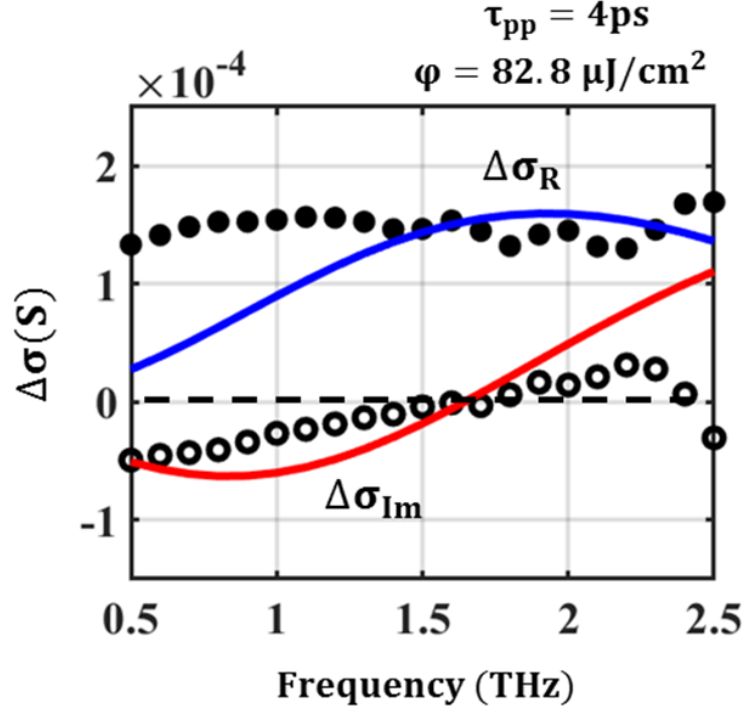

FIG. S2. The pump induced differential conductivity spectrum ( $\Delta\sigma(\omega)$ ) fitted using the modified Drude-Smith model using Eq.(S1)

19 deviation of the fitted curve from the experimental results confirms that  $\Delta\sigma(\omega)$  cannot be  
 20 explained using the MDS model.
